# Supplementary material for: Real time updating of the flood frequency distribution through data assimilation
Source: Copernicus journal article supplement (doi:10.5194/hess-2016-575), 2016-12-15
Supplement: Supplementary file [file hess-2016-575-AC1-supplement.pdf]

# **Real time updating of the flood frequency distribution through data assimilation**

## Reply to the reviewers' comments

We are extremely grateful to the reviewers for their valuable comments and we would also like to thank the Editor and the Editorial Office for the assistance provided during the review process.

### **Reply to reviewer #1**

Reviewer #1 is satisfied by the paper in the present form and provides a minor comment. He/she suggested justifying the choice of the NQT over a bivariate distribution directly inferred on the data as he/she feels that a bivariate distribution directly inferred from the data could provide more accurate results. Also he/she suggests quantifying the uncertainty of the proposed conditioned distributions.

Accordingly, we added the following statement to justify the choice of the method in section 3.2 in the revised version: "Among the advantages of the NQT, reviewed by Maranzano and Krzytofowicz (2004), emerges the fact that it is free of any distributional assumption. Thus, the NQT allows one to avoid the selection of a suitable parametric model for the distribution of the considered hydrological variable."

As for quantification of uncertainty, we agree that this is an important issue that deserves to be discussed in the revised paper and therefore we will include an extensive discussion, which we anticipate here below.

Uncertainty in the conditioned distributions is mainly given by two sources: the first is uncertainty in the NQT, namely, uncertainty in the estimation of the marginal probability distribution of independent and dependent variables in the regression. The NQT is a non-parametric transformation and therefore its uncertainty cannot be determined quantitatively (see Maranzano and Krzytofowicz, 2004) and Montanari and Brath, 2004). We will emphasize that it is advisable that NQT is estimated by using long records encompassing a wide range of possible meteorological and hydrological conditions.

The second source of uncertainty is related to the estimation of the cross correlation coefficient between dependent and independent variables in the Gaussian domain. This uncertainty can be quantified for a given confidence level and again depends on the length of the records. We will determine such uncertainty quantitatively in the revised version of the paper.

### **Reply to reviewer #2**

Reviewer #2 is also satisfied by the paper but raises some issues and provides several comments in order to strengthen the value of the study. We offer a detailed point-by-point discussion here below where the original comments by the reviewer are copied in italics.

*My main comment is that the study could benefit from adding a cross-validation of the method. The current results seem to largely be a description of the pattern found for these two rivers. Adding cross validation could illustrate how identifying this relationship can help inform flood forecasting, as well as demonstrate the utility of this method. For example, what if you select years with anomalously high flows, omit them from the fitting procedure, and then assess how much this method improves prediction of floods in these years?*

We agree that a cross-validation in both rivers would definitely demonstrate the utility of the method regardless of the study site. This analysis will be included in the revised version. Additional paragraphs will be included in both the methodology (section 3.2) and the results section (section 4.2.2). We provide here an anticipation of the results.

We carried out a cross-validation of the method by removing the year with the wettest pre-flood season (1977 in the Po and 1944 in the Danube). We noticed a very little change in the cumulative distribution functions, which is a first demonstration of the robustness of the method (Fig. 1). Afterwards, we simulated a real time prediction of the probability distribution of the flood flows in the next flood season (Fig. 2). Results will be presented in the revised version of the manuscript.

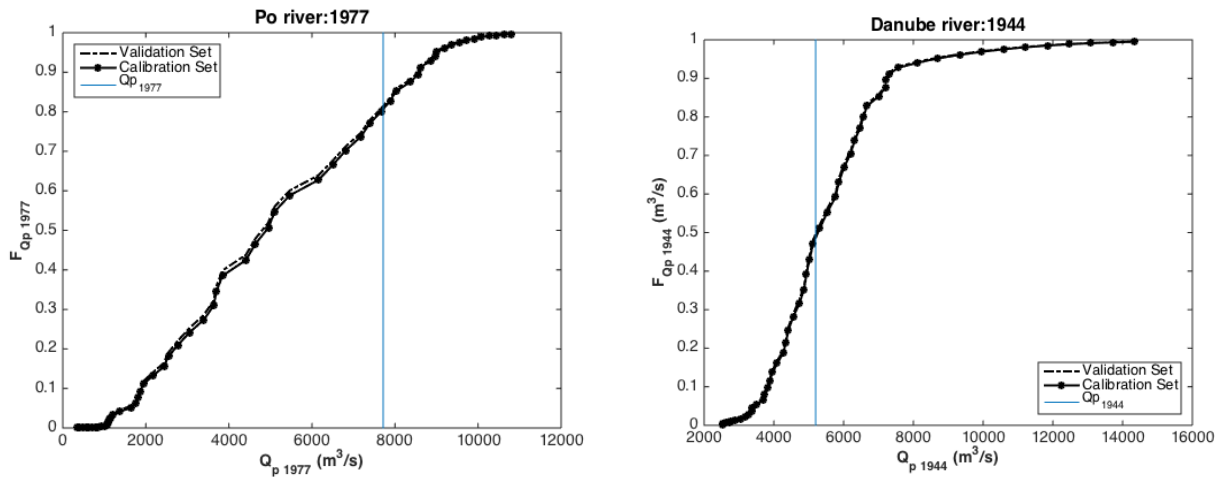

Figure 1. Cumulative distribution functions of the predicted  $Q_p$  in terms of the  $Q_m$  value in 1977 with the NQT considering both the whole data set (calibration set); and removing the data in 1977 (in the Po) and 1944 (in the Danube) from the analysis (validation set). The observed value is highlighted in blue.

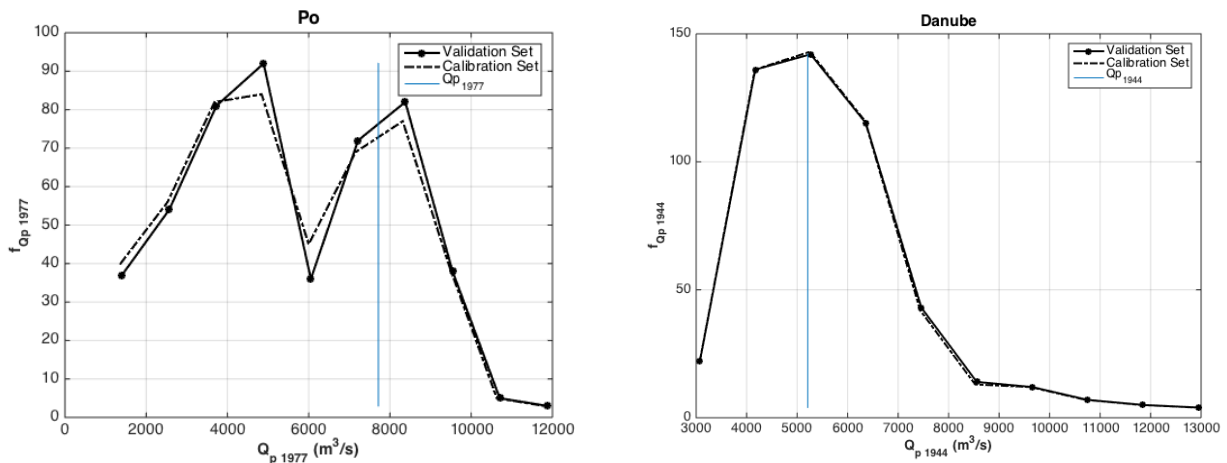

Figure 2. Probability distribution of the predicted  $Q_p$  in terms of the  $Q_m$  value in 1977 with the NQT considering both the whole data set (calibration set); and removing the data in 1977 (in the Po) and 1944 (in the Danube) from the analysis (validation set). The observed value is highlighted in blue.

*Also, it would be good to provide more rationale for Normal Quantile Transform as this choice likely has a big impact on results since floods generally aren't normally distributed. In addition, since meta-Gaussian models aren't commonly used in hydrology it would be helpful to add some more background on them. For example, why don't these models have fitted slope coefficients? Are these models considered linear models? Are the cross-correlation coefficients modified to ensure residuals have a*

*mean of zero? Readers with a more traditional statistics background will likely be looking for these components of the models.*

Following the reviewer's suggestion, we will make reference to the literature in which a full description of the NQT can be found (Krzysztofowicz, 1997; Kelly and Krzysztofowicz, 1997). Besides, we will add some more references to previous applications of the NQT in hydrological studies: Krzysztofowicz and Kelly (2000); Krzysztofowicz and Herr (2001); Krzysztofowicz and Maranzano (2004a, b); Maranzano and Krzysztofowicz (2004). Also, we will add the following paragraph in order to justify further the choice of the method: "Among the advantages of the NQT, reviewed by Maranzano and Krzysztofowicz (2004), emerges the fact that it is free of any distributional assumption. Thus, the NQT allows one to avoid the selection of a suitable parametric model for the distribution of the considered hydrological variable". These modifications will be incorporated in section 3.2 in the revised version.

*+why don't these models have fitted slope coefficients?*

Because they just need the standard normal distribution and the marginal probability distribution to define the NQT of the original variates.

*+Are these models considered linear models?*

Yes they are, as already stated in the paragraph previous to equation 7:

$$NQ_p(t) = \rho(NQ_m, NQ_p)NQ_m(t) + N\epsilon(t) \quad (7)$$

*+Are the cross-correlation coefficients modified to ensure residuals have a mean of zero?*

Cross-correlation coefficients are not modified, but the linear model assumes that residuals ( $\epsilon$ ) are considered to be an outcome of a stochastic process, which is independent, homoscedastic, stochastically independent of  $NQ_m$ , and normally distributed with zero mean and variance given by  $1-\rho^2(NQ_m, NQ_p)$ . The goodness of fit based on the behavior of the residuals verifies that these conditions are met and therefore ensures that residuals have a mean of zero.

*You present a review of LTP in the introduction and the abstract includes that the approach assumes flood formation is driven in part by "long term perturbations". Usually I think of long term as referring to longer than a year, but later you define "long term stress, like higher than usual rainfall lasting for several months". Can you explain a bit more about how you are defining "long term" and the link with LTP given that 9 months before flood season is the farthest back you look at correlation? And that flows before flood season only have positive correlation with during flood season for the Po river for preceding 3-4 months.*

Unlike short term perturbations, that we consider to be driven by short term meteorological forcings leading to infiltration and/or saturation excess, long term perturbations may be due to higher-than-usual storage in the catchment, which may cause the presence of seasonal to interannual correlation.

We agree with the reviewer that long term persistence, which we mathematically define in the manuscript, is in principle extended to the whole past history of the process and therefore not only to the few past seasons. We are also aware that seasonal correlation is not necessarily caused by LTP, as it may also be originated by short term correlation. However, the presence of LTP makes seasonal correlation more likely and therefore we believe that a study focusing on seasonal correlation should be supported by an estimation of the possible presence of LTP. This is the reason why we believe that LTP estimation fits in our paper. We will expand this discussion in the revised version of the manuscript.

*I am also curious how looking at shorter record length impacts the correlation between these variables? The data was de-trended and deseasonalized - does that mean that the correlations shown in Table 3 are stable even for subsets of the whole record you have for these rivers?*

It is well known that correlations computed on short records may become unreliable. We agree that this is an important issue and therefore we will include in the revised version of the paper a quantitative estimation of uncertainty for the cross correlation coefficient.

For our specific case, the data sets considered in our study are very long and therefore we are convinced that uncertainty in the estimation of the cross-correlation coefficient is negligible. The minimum data length to ensure meaningful conclusions depends on the statistical behaviors of the time series and, in particular, variability, as we will discuss in the revised version of the paper. From a hydrological point of view, it is important that records are long and encompass a wide range of possible meteorological and hydrological conditions.

To make an experiment, we took 100 random subsets of 70 years in Po and 85 years in the Danube from the original datasets and we computed the correlation coefficients for each subset. As an example, Figure 2 represents the results for the peak flows in both rivers whose basic statistics are shown in Table 1. As we can see, we obtained a mean value similar to those obtained with the whole data sets (Table 3 in the manuscript), and the standard deviation just changes the second decimal digit.

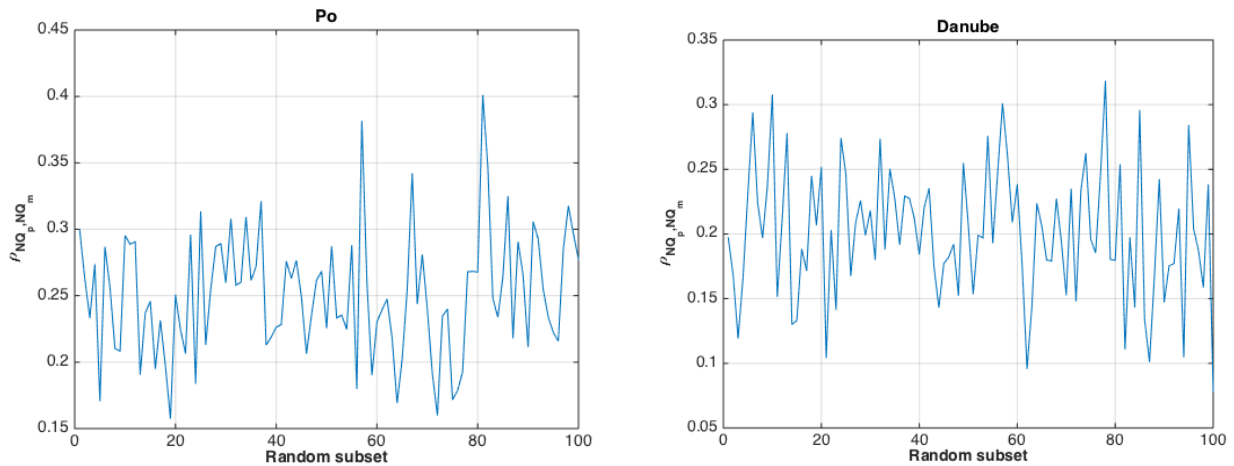

Figure 2. Pearson's cross correlation coefficient between  $NQ_p$  and  $NQ_{mf}$  for 100 random trials of subsets in the original datasets. Flood season in Po: October-November. Flood season in Danube: May-July

Table 1. Basic statistics of the Pearson's cross correlation coefficient between  $NQ_p$  and  $NQ_{mf}$  for 100 random trials of subsets in the original datasets.

| $\rho(NQ_m, NQ_p)$ |           |               |
|--------------------|-----------|---------------|
|                    | <b>Po</b> | <b>Danube</b> |
| Mean               | 0.25      | 0.20          |
| Maximum            | 0.40      | 0.32          |
| Minimum            | 0.16      | 0.08          |
| Standard deviation | 0.05      | 0.05          |

Finally, we would like to emphasize that data were detrended and deseasonalized for long-term memory assessments but the analysis of the statistical dependence between the peak flow in the flood season and the average flow in the pre-flood season was carried out with the original data set. Nevertheless, we also computed the correlations with the detrended and deseasonalized series and they do not change much (just the third decimal digit). We found a higher change in the correlation values (but still not a great change, just variations in the second decimal digit) when we applied the cross-correlation and removed the wettest year in the pre-flood season.

*More explanation of how to interpret figure 3 would be good for those of us not familiar with these types of figures. Do the regularity values come from which concentric circle the points fall on?*

In order to better interpret figure 3, the following paragraph will be added at the end of section 3: “Results are shown in a circle plot where each date of occurrence of the variables analyzed in the data set is visible along the perimeter. The timing of the global occurrence of each of the variables analyzed can be easily identified in terms of the slice of month where it falls. Also, the proximity to the center of the circle indicates the regularity of the phenomenon, with the highest regularity found in the perimeter of the circle.”

*Model residuals appear homoscedastic but what about normality? Perhaps you can mention that meta-Gaussian models don't require the usual assumption about lack of correlation in residuals, right?*

Residuals were also checked for normality as this is an underlying assumption. The manuscript will be revised to make this requirement clear.

Serial correlation is assumed to be negligible, as we are regressing the annual peak flow against the average flow in the low flow season. Therefore, each year we have a pair of data and thus the above assumption is fully justified and in our opinion does not need to be checked (see also Montanari and Brath, 2004; Maranzano and Krzystofowicz, 2004).

*It was unclear to me why was temperature was included in the study. Temperature patterns are discussed in the section on long term persistence, but there isn't an explanation of how temperature relates to the model or goals of the study.*

Temperature as well as rainfall were included to verify whether the hypothesis of the presence of LTP is supported by data evidence in both rivers. We consider both variables to be the major drivers of river flows in both rivers, where both water mass and energy balances determine the response of the catchment. Once we demonstrated that the presence of LTP in the river flow data may be a reasonable working assumption, we use the river flow in the pre-flood season as explanatory variable. We provided in the introduction of the paper a justification for the use of river flow data as a proxy for mean areal rainfall over the catchment.

*The conclusion section is quite short and could benefit from some additional discussion, perhaps something about the utility of the method for other locations and differing catchment sizes. The abstract notes “The proposed technique may allow one to reduce the uncertainty associated to the estimation of flood frequency” – could you elaborate on this in the conclusion?*

We agree with the reviewer and will extend the concluding remarks by discussing the applicability of the method to other cases.

*Minor comments*

*The use of the word “significant” should be clarified (as in the abstract and p 12, line 19). Do you mean statistical significance? At what level?*

We used the term “significant” to mean “noticeable”. We will change the terminology to avoid confusion with terms used in statistics.

*Abstract Lines 15-17: I think this would be clearer if re-organized, perhaps: “To exploit the above sensitivity to long term perturbations, a Meta-Gaussian model and a data assimilation approach is implemented for updating the flood frequency distribution a season in advance.” OK*

*Abstract Line 20: A word is missing: I would suggest adding “which” before “occurred (ie, “which occurred” or even “occurring” rather than just “occurred”) OK*

*P 2 Line 11: an “a” is missing before “long time” OK*

*P 2 Line 15: “associated with” more commonly used than “associated to” OK*

*P 4 Line 20 Extra word “on” before “the trend” OK*

*P 4 Line 24 I suggest adding a comma after “As stated in the Danube River Basin Management Plan” (since it is a dependent clause) OK*

*P 4 Line 25 significantly rather than significant? OK*

*Page 9 line 18 “was” after a plural sounds strange – perhaps “We applied directional statistics. . .” OK*

*P 10, lines 4 This makes it sound like 0.71 is a sort of cut off. Perhaps “H values above 0.5” would be better here, reminding us that that is the cut-off of interest. Or you could say “H values of 0.71 or higher”. OK*

*P 11 line 14 You refer to table 2 but I believe you mean table 3*

Yes, we apologize for the error. It will be corrected in the revised version.

*P 11 line 15 I’m not sure what you mean by “we appreciate” here.*

We changed it to “always found”

*P 12 line 1 Is it really “A goodness-of-fit test” or more an evaluation that model assumptions about the residuals are met?*

We agree that it is an evaluation that the model assumptions about the residuals are met. We will revise the text accordingly.

*P 12 line 13 – again, perhaps “we find” rather than “we appreciate” OK*

*P 12 line 19 June is mentioned but not shown on the plots? Was that intentional?*

We regret that there was an error and we meant July. It has been corrected in the revised version.

*P 13 lines 1-3 The text has: “The anomaly in the low correlation coefficient in March previously explained determines an insignificant change in the estimate with respect to the unconditioned distribution.” But it appears that the line corresponding to march coincides with the line corresponding to January, not to the unconditioned distribution.*

Yes, we apologize for the error. It has been corrected in the revised version.

*Figure 4 – I find it helpful to add a horizontal line at 0 when assessing homoscedasticity of residuals. Though I’m not sure we need to see these plots. Just describing them in the text is probably sufficient.*

We regret to disagree here with the reviewer as these plots show the evaluation of the behavior of the residuals and so, including them allows us to assume that the linear model proposed can be applied to our data.

*Figures 5-6 Adding a-f markers to each subplot would help with finding the plot being discussed in the text; add labels to y-axes OK*

*Figure 7 add to caption that the quantiles refer to flows higher than usual in the previous month. OK*
